1  
2  
3 **Permutation tests for hypothesis testing with animal social data: problems**  
4 **and potential solutions**

5  
6  
7 Damien R. Farine<sup>1,2,3</sup> and Gerald G. Carter<sup>4,5</sup>  
8  
9

10 <sup>1</sup>Department of Collective Behavior, Max Planck Institute of Animal Behavior, Konstanz, Germany.

11 <sup>2</sup>Centre for the Advanced Study of Animal Behaviour, University of Konstanz, Germany.

12 <sup>3</sup>Department of Biology, University of Konstanz, Germany.

13 <sup>4</sup>Department of Ecology, Evolution, and Organismal Biology, The Ohio State University, Columbus, USA

14 <sup>5</sup>Smithsonian Tropical Research Institute, Balboa, Ancon, Panama  
15

16 **Correspondance:** [dfarine@ab.mpg.de](mailto:dfarine@ab.mpg.de)  
17  
18  
19

20 **ABSTRACT**  
21

- 22 1. Generating insights about a null hypothesis requires not only a good dataset, but also  
23 statistical tests that are reliable and actually address the null hypothesis of interest. Recent  
24 studies have found that permutation tests, which are widely used to test hypotheses when  
25 working with animal social network data, can suffer from high rates of type I error (false  
26 positives) and type II error (false negatives).  
27 2. Here, we first outline why pre-network and node permutation tests have elevated type I and  
28 II error rates. We then propose a new procedure, the double permutation test, that  
29 addresses some of the limitations of existing approaches by combining pre-network and  
30 node permutations.  
31 3. We conduct a range of simulations, allowing us to estimate error rates under different  
32 scenarios, including errors caused by confounding effects of social or non-social structure in  
33 the raw data.  
34 4. We show that double permutation tests avoid elevated type I errors, while remaining  
35 sufficiently sensitive to avoid elevated type II errors. By contrast, the existing solutions we  
36 tested, including node permutations, pre-network permutations, and regression models with  
37 control variables, all exhibit elevated errors under at least one set of simulated conditions.  
38 Type I error rates from double permutation remain close to 5% in the same scenarios where  
39 type I error rates from pre-network permutation tests exceed 30%.  
40 5. The double permutation test provides a potential solution to issues arising from elevated  
41 type I and type II error rates when testing hypotheses with social network data. We also  
42 discuss other approaches, including restricted node permutations, testing multiple null  
43 hypotheses, and splitting large datasets to generate replicated networks, that can strengthen  
44 our ability to make robust inferences. Finally, we highlight ways that uncertainty can be  
45 explicitly considered during the analysis using permutation-based or Bayesian methods.  
46  
47  
48

## 49 INTRODUCTION

50

51

52

53

54

55

56

57

58

59

60

61

62

63

64

65

66

67

68

69

70

71

72

73

74

75

76

77

78

79

80

81

82

83

84

85

86

87

88

89

90

91

92

93

94

95

96

97

98

99

100

101

Permutation tests are among the most useful statistical tools for the modern biologist. They are commonly used in ecology (Gotelli & Graves, 1996), biogeography (Harvey, 1987), community ecology (Miller, Farine, & Trisos, 2017), and in studies of ecological networks (Dormann, Fründ, Blüthgen, & Gruber, 2009) and social networks (Croft, Madden, Franks, & James, 2011). Permutation tests randomize (or re-assign) observed data with respect to particular features to generate a distribution of statistic values that would be expected under a given null hypothesis. They are particularly useful when the standard assumptions of other statistical tests are violated, as is the case with social network data. Perhaps most importantly, permutation tests enable the researcher to create case-specific null models by permuting data in specific ways (e.g. constraining permutations within specific groups) while keeping other aspects of the dataset the same (e.g. where and when observations were made). For example, to understand how social network structure differs from what would be expected if animals made random social decisions, a researcher can permute the observation data to create many expected networks that could have occurred in the absence of social preferences (*pre-network permutations*). Alternatively, a researcher can ask whether the distribution of trait attributes within a network is not random by preserving the same observed network properties in all the randomised networks and only permuting the node attributes (*node permutations*). The difference in the design of these two permutation approaches has important consequences. They make different assumptions, they have different strengths and weaknesses, and, ultimately, they assess different null hypotheses. These consequences, together with the diverse range of drivers of network structure, can make even the most basic test of a hypothesis using animal social networks surprisingly difficult.

Recent studies (Weiss et al. 2020; Puga-Gonzalez et al. 2020) have highlighted some of the challenges that researchers face when testing hypotheses about the relationship between a predictor and a response variable, when one of these variables is generated from social network data. Consider these common questions: Does pairwise kinship influence association rates (edge weights)? Does an individual's sex predict how many associates it has (degree centrality)? To test the null hypothesis in these cases, we need to know what the data would look like in the absence of the effect of interest (in these cases, no effect of kinship or sex, respectively). A node permutation test tells us whether there is a statistical relationship between the effect of interest and the patterns of connectivity among the nodes in the observed network. The problem, however, is that the animal social networks that we observe are often the outcome of many processes and effects, besides the hypothesized effect of interest, and a node permutation test is not able to distinguish the hypothesized effect from the contributions of other, confounding, effects. A pre-network permutation test can better control for a range of confounding effects, however, it is actually testing a different null hypothesis—that the network-generating processes is random.

We can broadly assign confounding effects—effects that contribute to structuring a social network but are unrelated to the hypothesis of interest—to two categories. First, there are multiple non-social “nuisance effects”, such as biases in sampling, non-random spatial constraints, and temporal differences in the presence or absence of individuals. These nuisance effects constrain our ability to observe each individual or dyad equally, meaning that network edges represent the outcome of not only social decisions, but also methodological and other non-social processes or constraints. Nuisance effects are common to most empirical studies in ecology, but the impacts of nuisance effects can be particularly pronounced in social network studies because they estimate pairwise relationships among individuals, as opposed to measuring the individuals themselves, and relationships are much more numerous than individuals. Second, there can be multiple social effects, besides the effect of interest, that operate simultaneously to shape the connections among individuals. In other words, nonrandom social structure often has multiple social causes or constraints. For example, individuals might have a limited number of possible close associates or always vary in their tendency to associate with different groupmates. Another example is triadic closure: if an individual A is closely associated to individual B that is also closely associated to individual C, then this will necessarily result in more encounters between A and C even in the absence

102 of any social preferences between A and C. The relative roles of such social and non-social  
103 confounding effects on the observed network structure can be difficult to identify and disentangle  
104 (Figure 1). Failing to do so can easily lead to spurious outcomes (Farine & Aplin 2019).  
105  
106

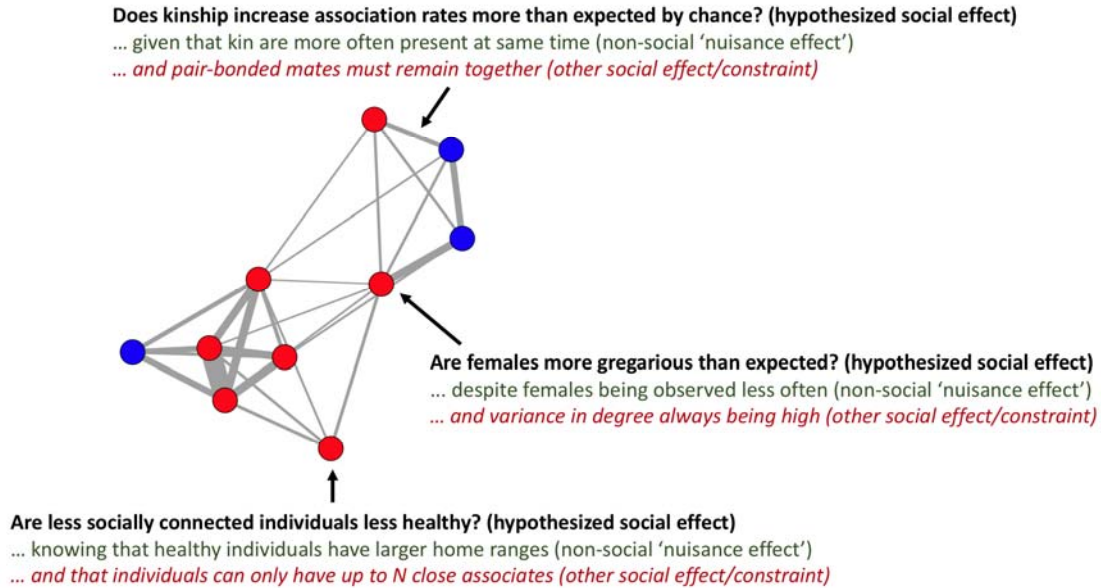

107  
108  
109  
110  
111  
112  
113  
114  
115  
116  
117  
118  
119  
120  
121

**Figure 1. Observed social networks are usually the product of many different social and non-social effects, which can impact the observed difference or relationship that is expected by “chance”.** Researchers typically aim to test for a relationship between a measure taken from the social network data and some independently-measured data. Such tests can take the form of a predictor (e.g. sex, kinship, health) on a social response (e.g. degree centrality, edge weight, eigenvector centrality), of a social predictor (e.g. degree centrality) on a response (e.g. infection status), or via an estimation of the correlation between network and non-network-based measures. However, spurious relationships and correlations are common in social network data because of multiple non-social ‘nuisance effects’ (examples above) and other social effects or constraints (examples in italics above). We give examples of each effect above, but many other such effects are possible. Pre-network permutation tests can control for some non-social nuisance effects, but other social effects or constraints that shape the network structure are not maintained. Node permutation tests can control for the contribution of other social effects or constraints on the social network structure, but precisely controlling for non-social nuisance effects is more challenging.

122  
123  
124  
125  
126  
127  
128  
129  
130  
131  
132  
133  
134  
135  
136  
137  
138  
139

Two common permutation approaches (pre-network permutations and node permutations) create null expectations that are better at addressing one category of confounding effects but not the other. Pre-network permutation tests swap observations to create a set of possible networks that would be expected from animals showing no social preferences (e.g. about which social groups to join), and these can effectively control for nuisance effects by constraining these swaps within blocks of time and space. For example, one might swap observations within sampled locations to control for spatial effects or within sampled time periods to control for non-overlapping presence and temporal autocorrelation in behaviour (Farine, 2017; Spiegel, Leu, Sih, & Bull, 2016; Sundaresan, Fischhoff, & Dushoff, 2009; Whitehead, 2008; Whitehead, Bejder, & Ottensmeyer, 2005). Unless explicitly designed to do so, pre-network permutation tests do not distinguish among alternative social processes, thereby creating a different problem. Pre-network permutation tests can yield unacceptably high rates (>30%) of false positives when drawing inferences about the effect of a predictor X on a response Y (i.e. linear models or difference between means, where one of X or Y is a network-based measure; Weiss et al. 2020; Puga-Gonzalez et al. 2020). These high type I error rates occur because pre-network permutation tests do not actually address the null hypothesis that X is distributed randomly with respect to Y (or that the effect of X on Y is zero); instead they test if the distribution of X with respect to Y is different than expected had individuals made random social choices given the possible options that were available to them. For example, spatially-restricted pre-

140 network permutations simulate a scenario where individuals' spatial decisions are not socially  
141 influenced, and all pre-network permutations assume that individuals make decisions independently  
142 of each other. In other words, because pre-network permutations aim to remove all bias from social  
143 decisions in the randomised networks, these networks also deviate from the realistic non-random  
144 social structures that are expected for a given species or population.

145 Node permutation tests face a different problem. Although they can test for a non-random  
146 relationship between variables X and Y in a way that controls for social structure, they also assume  
147 that the observed network corresponds to the real social structure (i.e. the structure based on social  
148 preferences in the absence of any non-social "nuisance effects"). This assumption makes sense if the  
149 social networks were completely accurate reflections of social preferences, but observed animal  
150 social networks (as with most biological data) are almost always shaped by at least some  
151 observational, spatial, and temporal biases. For example, some individual animals might only use a  
152 subset of all possible locations where observations were made, individuals might vary in the amount  
153 of their home range that overlaps with the study area, some individuals might leave or join the study  
154 population at different times, and some might not be individually marked or identifiable for the  
155 entire duration of the study. Even if some processes are relevant to the hypothesis of interest (for  
156 example individuals' decisions about where to settle in space) they can still contribute to some  
157 inaccuracies in the resulting network. For example, individuals at the edge of a study area (compared  
158 to individuals at the centre of the area) might have many more associations with individuals that  
159 were never observed (we discuss further examples below). These nuisance effects can vary in  
160 magnitude and importance across study designs, but they are arguably inevitable. Even automated  
161 methods such as proximity sensors (Ryder *et al.* 2012; Ripperger *et al.* 2020) or barcodes (Crall *et al.*  
162 2015; Alarcón-Nieto *et al.* 2018) that aim to provide equal sampling across individuals would not be  
163 free of sampling biases, if animal-borne proximity sensors vary in their sensitivity (for example due to  
164 tiny differences in how they were soldered) or if some barcodes are more difficult to identify by  
165 computer vision. Thus, methodological factors are rarely completely eliminated, even under highly  
166 controlled conditions. Such sampling biases and other nuisance effects can lead to elevated rates of  
167 false positives and false negatives when using node permutations (Croft *et al.* 2011; Farine &  
168 Whitehead 2015; Farine 2017; Puga-Gonzalez, Sueur & Sosa 2020), and many can be quite difficult to  
169 correct using correction terms in a statistical model.

170 A major challenge, as it stands, is developing permutation methods that can robustly account  
171 for both social and non-social nuisance effects. One approach to dealing with nuisance effects is to  
172 control for them by including them as covariates or random effects in a statistical model.  
173 Incorporating a specific non-social nuisance effect, such as the number of observations of each  
174 individual (which affects network metrics like degree) explicitly into the model can correct the  
175 coefficient values. Doing so helps ensure that the zero value of a test statistic (like a t-value or linear  
176 slope) accurately represents the null hypothesis of interest, potentially alleviating the need for pre-  
177 network permutation tests (Franks *et al.* 2020). While there are major advantages to this approach,  
178 the process of capturing all nuisance effects in the model becomes increasingly challenging as the  
179 number of interacting effects increases. Observed network data often have multiple simultaneous  
180 nuisance effects, and attempting to measuring all of them individually, let alone in combination, can  
181 be more difficult than with a permutation-based approach, which maintain nuisance effects (and  
182 their variation) constant across the permuted networks. For example, it is challenging to assign  
183 individuals to a singular spatial location, as required when fitting individuals' location as a random  
184 effect, if home ranges are continuously distributed and overlapping in space. It is also difficult to  
185 control for cases where two individuals have both been repeatedly observed at the same location(s)  
186 but were never present there at the same time. A strength of pre-network permutation tests is that  
187 they can inherently control for multiple potential nuisance effects because the permuted data can be  
188 kept identical to the observed data with regards to the number of observations per individual, the  
189 size of groups, individual variation in space use (and therefore spatial overlaps with all others),  
190 temporal auto-correlation in behaviour, temporal overlap among all pairs of individuals, the  
191 distribution of demographic classes across space and time, the variation in the density of individuals

192 across space and time, differences in sampling effort across space and time, and the observability of  
193 individuals.

194 Our goal here is to propose an initial solution to the current problems with the use of  
195 permutation tests outlined above. Our solution uses both pre-network and node permutations for  
196 what they each do best: pre-network permutations to control for nuisance effects, and node  
197 permutations to statistically test for the effects of X on Y while holding the network structure  
198 constant across expected networks. Our approach proceeds as follows: (1) we calculate the network-  
199 based observations of interest (e.g. degree for each node or edge weight for each dyad), (2) we use  
200 pre-network permutations to generate an expected null distribution of alternative network-based  
201 expected values for each unit (node or edge), (3) to control for nuisance effects, we subtract the  
202 median of the expected values for each unit from its corresponding observed value to create  
203 residual-like estimates, (4) we fit these “residuals” into the statistical model, and (5) we use node  
204 permutations to calculate the P value for the observed effect of X on Y, where the network-based  
205 variable and corresponding test statistic are now corrected for nuisance effects.

206 This double permutation procedure tests the null hypothesis that deviations from random  
207 social structure (within some set of constraints) are not explained by the predictor variables. The  
208 procedure can be easily applied to any model for calculating test statistics, such as Mantel tests  
209 (Mantel, 1967), network regression models like MRAQP (Dekker, Krackhardt, & Snijders, 2007), and  
210 metrics such as the assortativity coefficient (Farine, 2014; Newman, 2002). As we will show, it also  
211 performs equally well with group-based association data and with data collected using focal  
212 observations. We acknowledge that this is only one potential solution, and we therefore also  
213 highlight alternative methods that are also worth evaluating further, including several that are not  
214 based on permutation tests.

215  
216

## 217 ILLUSTRATING THE DRIVERS OF TYPE I AND TYPE II ERRORS

218

219 Before we discuss our solution in detail, let us clarify the main problem by considering a  
220 simple, verbal, but concrete example of why errors can arise when using permutation tests. Imagine a  
221 study population where animals cluster for warmth each night in variable groups of 2-10 individuals.  
222 The dataset contains a list of observed clusters, their location, time, and the individuals in those  
223 clusters that could be correctly identified. From these data, researchers generate a network  
224 describing the propensity for each dyad to be observed in the same cluster with the aim of finding  
225 out if kin are more likely to cluster. Specifically, they ask: Does the dyadic kinship predict the observed  
226 propensity to be observed clustering together (edge weight)?

227 First, the researchers consider a node permutation approach (e.g. using a Mantel or MRQAP  
228 test). However, if siblings are born at the same time, limited to similar home ranges, and then  
229 disperse at around the same time—then they could be more associated with each other than with  
230 non-kin, even without kin discrimination (e.g. Leedale *et al.* 2018). Under such a scenario, a  
231 significant result from a node permutation would correctly support that the network is kin-  
232 structured, but represent spurious support for the specific hypothesis that kinship is a driver of social  
233 associations. Alternatively, a non-significant result may be caused by sampling bias. For instance,  
234 associations among kin could be under-estimated if younger animals are both more likely to associate  
235 with kin and less likely to be individually marked and recorded. In summary, hypotheses about the  
236 process generating an effect of kinship on association could be challenging to accurately assess using  
237 node permutations, in the presence of nuisance effects (but see Alternative Approaches section for  
238 more discussion on how node permutations can be restricted to potentially help alleviate some of  
239 these effects).

240 The researchers might therefore turn to using a pre-network permutation test. They create  
241 expected outcomes (i.e. measure the relationship between kinship and edge weights) after  
242 repeatedly swapping individual observations within sampled locations and time periods. Doing so  
243 allows them to eliminate the nuisance effects described above. However, now imagine that there is  
244 another unknown social effect: all individuals spend about 90% of their time with only 1-3 closely

245 bonded associates. This constraint on social structure means that every node (individual) always has  
246 a large variance in edge weights across all its possible associations, because many association rates  
247 are zeros while a few others are closer to one, and this variance is much greater than expected from  
248 random associations. When the researchers create randomised networks using pre-network  
249 permutations, the observations of individuals (i.e. their social actions) are swapped independently of  
250 each other, meaning that individuals in the resulting random networks almost never (or possibly  
251 never) spend 90% of their time with a few individuals, while many zeros are replaced with non-zeros  
252 as individuals that never co-occurred are swapped into groups together. While this removal of social  
253 preferences is one of the aims of pre-network permutation tests, it can confound non-random social  
254 structure generated by the trait of interest with that of other processes not related to the hypothesis  
255 being evaluated. In the context of the kinship scenario above, even if close social bonds are not kin-  
256 biased (i.e. the social bonds are randomly distributed with regards to kinship), the extremely non-  
257 random social structure of the observed network could easily lead to a false positive with regards to  
258 the effect of kinship. If even a few strong bonds exist among kin by chance in the observed data, it is  
259 possible that these strong kin bonds will never appear in the expected data. This scenario occurs  
260 because the observed network typically has much higher variance in the measure of interest (edge  
261 weight or node metric) than the corresponding random networks from pre-network permutations  
262 (Aplin *et al.* 2015; Firth *et al.* 2018; Weiss *et al.* 2020). Thus, once again, the actual effect of kinship  
263 on association is challenging to accurately evaluate in the presence of a confounding effect (in this  
264 case social preferences unrelated to kinship).

265 The false positive in the last example is related to a different potential problem with pre-  
266 network permutation tests—they can provide overly-confident estimates of minor deviation from  
267 random (Figure 2). In part, this problem occurs because constructing social networks requires large  
268 numbers of observations (Langen 1996; Farine & Strandburg-Peshkin 2015; Davis, Crofoot & Farine  
269 2018) with many repeated observations of the same individuals, and a sufficiently large number of  
270 observations can invariably produce P values well below 0.05 even when the effect size is not  
271 biologically important (Figure 2).

272 Pre-network permutations are also likely to suffer from more incorrect inference in analyses  
273 based on networks containing only a few nodes. For instance, consider a network containing only  
274 three nodes (male, male and female), from which only three dyadic associations are recorded, with  
275 all three being between the two males. In such a scenario, a pre-network permutation testing  
276 whether females are less connected (lower degree) than expected by chance would be significant at  
277  $P < 0.05$ , as the observed data is the only one of 27 combinations of the three dyadic associations that  
278 would result in the female having a degree of zero (the P value here would approach 0.037). Clearly,  
279 any inference drawn from three observations of three individuals would be immediately apparent as  
280 unreliable, but the same problem can be harder to notice in more complex analyses.

281  
282

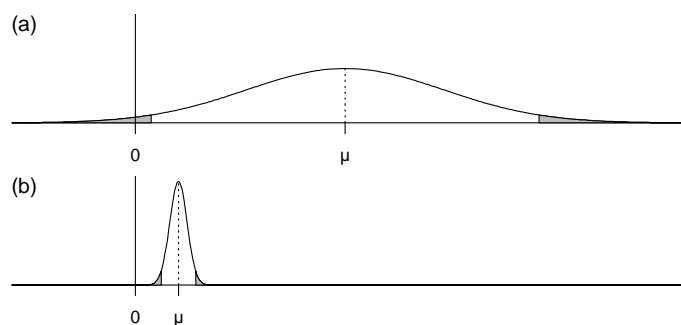

283  
284 **Figure 2. The problematic relationship between effect size and significance.** (a) A large effect in a test with a relatively low  
285 power dataset, producing a P value of 0.016. (b) A weak effect in a test with a high-power dataset, producing a P value of  
286  $2.87 \times 10^{-7}$ . The former is more biologically significant, whereas the latter is more statistically significant. When drawn from  
287 large numbers of observations, pre-network permutation tests can detect marginal differences that have little biological

288 relevance (i.e. b), thereby producing elevated type I errors (sensu Nakagawa & Cuthill 2007; Lantz 2013; Szucs & Ioannidis  
289 2017).

290

291 The previous example illustrates problems caused by nuisance effects involves variables that  
292 are traits of dyads (edges), and the same principles apply when testing hypotheses relating the traits  
293 of individuals (nodes) to their connectivity in the network. For instance, a false impression that male  
294 birds are more gregarious (i.e. sex predicts degree centrality) could be caused by sex-based  
295 differences in observability, attraction to spatially clumped resources, variation in home-range size,  
296 differential survival in different habitats, or differences in the timing of their presence or absence in  
297 the population. Again, these issues are common to many other types of ecological studies, but their  
298 influence can be exacerbated in social network studies. Some of these effects are sampling effects;  
299 others will only cause a problem if there's a mismatch between the question of interest to the  
300 researcher and the question being addressed by the analysis (e.g. 'do males prefer larger groups?'  
301 versus 'do males occur in larger groups?', see Figure 3). Further, while we refer to many nuisance  
302 effects as 'non-social', social behaviours can also contribute to these effects, and studies could benefit  
303 from making more explicit considerations of the social decisions that contribute to them. For  
304 example, individuals' spatial ranges could be determined by social habitat selection (e.g. density-  
305 dependence in their decisions to settle in a location or move elsewhere). We provide some advice on  
306 how permutation tests can help uncover such effects in the future directions section.

307 Social behavior itself can affect observability. For example, if females tend to be found at the  
308 periphery of groups, then an observer standing close to the center of a group might be more likely to  
309 miss observations of females and their associates, whereas the observer can always detect the  
310 associates of the (predominately male) individuals at the center of a group, thereby introducing a sex  
311 bias in the number of observed associates. An observer standing outside the group could have the  
312 opposite bias. This simple example highlights how biases can arise even when observations are made  
313 in groups where every individual is individually-identifiable, and why the focus on detecting  
314 relationships (i.e. estimating edges) makes network studies more prone to nuisance effects than  
315 many other types of studies.

316

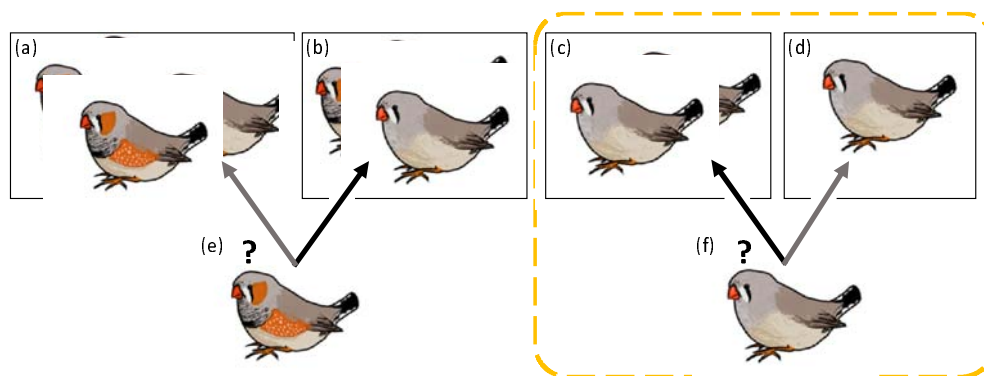

317

318 **Figure 3. Example of the challenges associated with testing hypotheses on social data.** Are males more often in larger  
319 groups? In the scenario shown above, males (colourful individuals) are observed in larger groups (e.g. groups a, b, c) more  
320 often than are females (less colourful individuals). However, now consider the question: Are males more gregarious than  
321 females? The same observation is not informative about the causal processes with respect to this question. Imagine that  
322 groups a and b represent birds outside a territory (shown by the dashed line) defended by a single dominant male (in c).  
323 Females are allowed to enter freely and form groups within the territory (c and d) but other males are excluded. Even if  
324 each male (e) chooses smaller groups (b vs a), and females (e.g. f) choose larger groups (c vs d) in their given environments,  
325 we could still observe males in larger groups than females due to the constraints imposed by the territory. Thus, even if  
326 males are less gregarious, they can end up having more social connections. A node permutation test (where the sex labels

327 are randomized in the overall network) that produced a significant result would incorrectly support for the hypothesis that  
328 males are more gregarious. By permuting the individual observations within locations (a pre-network permutation), we can  
329 simulate the random social decisions that individuals would make given the options that were available to them. Under such  
330 a null model, a subordinate male that was never seen in the territory (groups c and d) would never be observed there in the  
331 permuted data, and would therefore always be found in larger groups. Such a test would correctly avoid rejecting the null  
332 hypothesis that males are more gregarious (because in the randomised data they would always chose larger groups).  
333 However, the same pre-network permutation test would incorrectly fail to reject the null hypothesis that males and females  
334 do not differ in their numbers of connections, if that were the question of interest.

335

336 An advantage of pre-network permutations is that they allow precise control over many  
337 possible nuisance effects, without needing to measure or even identify them. For example,  
338 individuals at the edge of a study area, where a lower proportion of individuals are individually-  
339 identifiable, would always occur in groups containing fewer individuals that can be individually-  
340 identified; controlling for space would automatically control for differences in group size that arise  
341 due to spatial variation in identification rates. Such an effect could be challenging to control for by  
342 explicitly including it in a statistical model. However, pre-network permutation tests can allow many  
343 other important aspects of the data to change (such as degree distributions or variances) in the  
344 expected data, and thus pre-network permutations alone cannot be used to assess the effect of a  
345 predictor while controlling for social structure (Weiss et al. 2020, Puga-Gonzalez et al. 2020).

346

347

#### 348 **THE DOUBLE PERMUTATION METHOD**

349

350 We propose an approach that uses pre-network permutations to control for nuisance effects,  
351 and then uses node permutations to test for the statistical significance of the effect of interest. Our  
352 double permutation testing method (Figure 4) first uses pre-network permutations to calculate the  
353 deviation of each of the units of interest (a node-level or edge-level metric) from its random  
354 expectation given the structure of the observation data. That is, by comparing a unit's observed  
355 measure to its expected random value (e.g. the median values of the same unit's measure across the  
356 permuted networks), we can calculate the equivalent of a residual value. These residual values can  
357 then be fit into a model of interest—such as an MRQAP, regression, or other model—to generate a  
358 corrected test statistic, and node permutations used to calculate the significance of this statistic. Such  
359 an approach is conceptually similar to generalised affiliation indices (Whitehead & James 2015), but it  
360 uses pre-network permutation tests, rather than regression models, to estimate the deviance from  
361 random, and it applies them directly to the metric of interest (e.g. a node's degree) rather than using  
362 a two-step process of calculating corrected affiliation indices before generating a given network.

363



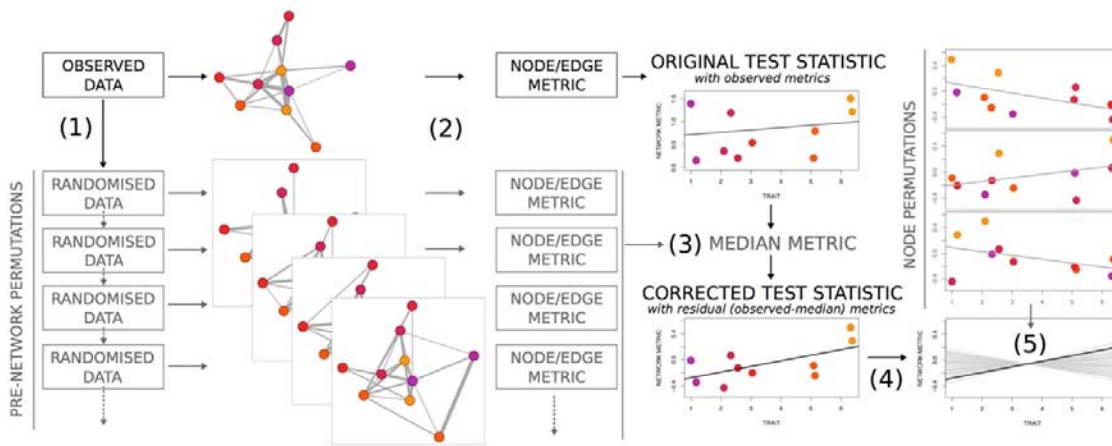

**Figure 4. Overview of the double permutation method.** We propose a solution to the problem of elevated type I and type II errors when using permutation tests in animal social network analysis. Our approach has four steps. (1) A pre-network permutation is used to (2) generate a distribution of expected metric values for a unit of interest (e.g. a node's degree or an edge's weight). For each unit (i.e. each node or each edge), (3) the unit's expected metric value (e.g. the median) is subtracted from its observed metric value, which yields a corrected metric value (the equivalent of residual values after controlling for non-social nuisance effects). (4) The test of interest (e.g. a regression, difference in means, or correlation), and its corresponding test statistic (e.g. the coefficient of the slope or the correlation coefficient) is calculated to generate a corrected test statistic. (5) A node permutation test, in which the trait values are shuffled relative to the residuals of the metric values, is then used to compare the corrected test statistic with those expected given the structure of the network, to generate a P value.

## TESTING THE ROBUSTNESS OF THE DOUBLE PERMUTATION APPROACH

We demonstrate the suitability of our approach using three sets of simulations. In the first, we show that double permutation tests provide robust outputs when used with regression models on group-based data, both in the absence of any real relationship (to test for elevated type I error rates) and when there is a strongly confounding nuisance factor (e.g. a spatial effect, to test for elevated type II error rates). In the second model, we use the same simulation framework as Puga-Gonzalez, Sueur and Sosa (2020) to demonstrate that double permutation tests are robust when using focal-observation data and when used to compare means. Finally, we develop a third model to show that double permutation tests are robust to testing edge-based hypotheses (e.g. the role of kinship in shaping the strength of connections among individuals) in the presence of other social effects (e.g. the presence of non-kin social bonds).

### Simulation 1: node-based regression

The first simulation starts by drawing  $N$  individual trait values  $T_i$  from a normal distribution with a mean of 0 and a standard deviation of 2. We assign each individual to have on average  $K$  observations by drawing  $K_i$  from a Poisson distribution with  $\lambda = K$  and balancing these values to ensure that  $\sum K_i = N \times K$ . We then create  $G$  groups, where  $G = 0.5 \times N \times K$ , and randomly assign each of these groups to have a group size value  $X$  ranging from 1 to 10. To allocate individuals into groups, we order the individuals from the smallest trait value to the largest to create scenarios where the trait value should impact the social behaviour of individuals (trait has social impact,  $T_S = TRUE$ ), or order these at random to create scenarios where the trait value has no relation to the social

401 behaviour of individuals ( $T_S = FALSE$ ). We assign each individual into groups by selecting the  
402  $K_i$  groups that have empty spaces, and with a higher probability of selecting smaller groups. In doing  
403 so, individuals earlier in the order are disproportionately more likely to be assigned to smaller groups,  
404 filling them up, and leaving only larger groups for later individuals to fill, thereby creating a  
405 relationship between individuals' trait value  $T_i$  and their weighted degree  $D_i$  when  $T_S$  is true.

406 From these observation data, we follow the design of our double permutation method (see  
407 Figure 4) to first calculate how each node's degree deviates from what is expected from random  
408 behaviour, and, second, to calculate the relationship between the residual weighted degree values  $D'_i$   
409 and the trait values  $T_i$ . We then implement two conceptual variations,  $L_S$ , to go with the two  $T_S$   
410 scenarios above. The first variant (no location effect,  $L_S = FALSE$ ) is a scenario in which the group  
411 size values  $X$  corresponds to the outcome of social decisions. In the second variant (location effect,  
412  $L_S = TRUE$ ), we assume that rather than  $X$  representing a group size preference,  $X$  instead  
413 corresponds to spatial preferences, such that individuals prefer patches closest to the centre of their  
414 home ranges in a one-dimensional linear environment ranging in values from 1 to 10. Patches at one  
415 end of this environment, i.e. those patches with a larger  $X$ , contain more resources and therefore can  
416 hold more individuals. These variants enable us to use the same code to produce a relationship  
417 between  $T_i$  and network degree  $D_i$  where in one scenario where the decisions are social ( $T_S = TRUE$   
418 and  $L_S = FALSE$ ) and in another scenario where the relationship between  $T_i$  and  $D_i$  arises from  
419 decisions that are not social ( $T_S = TRUE$  and  $L_S = TRUE$ ). To control for the location  $X_j$  that each  
420 group was observed in when  $L_S = TRUE$ , we used within-location swaps in the pre-network  
421 permutation tests.

422 We simulate 100 replications for varying combinations of network sizes, with number of  
423 individuals ranging from  $N = 5$  to  $N = 120$  and for mean numbers of observations per individual  
424 ranging from  $K = 5$  to  $K = 40$ . The different combinations of scenarios ( $T_S$  and  $L_S$ ) allow us to  
425 evaluate the performance of different approaches in cases where there are no real effects ( $T_S =$   
426  $FALSE$  and  $L_S = FALSE$ ), real social effects but no nuisance effects ( $T_S = TRUE$  and  $L_S = FALSE$ ),  
427 and where the driving factor behind the effect is a strong non-social nuisance effect ( $T_S = TRUE$  and  
428  $L_S = TRUE$ ). The latter represents an example of a study with a confound (differences in spatial  
429 preferences among individuals) that is challenging to control for because individuals are observed in  
430 most locations, meaning that their spatial preferences cannot be reduced down to a single value,  
431 which is required when model fitting (e.g. adding location as a random effect) or when restricting  
432 node permutations by location (because each node can only have one location attribute used for  
433 swapping).

434 For each run of the simulation, we calculate P values for the effect of the trait value on  
435 degree using (1) node permutation tests with the coefficient value as the test statistic, (2) node  
436 permutation tests with the coefficient value as the test statistic while controlling for number of  
437 observations (Franks *et al.* 2020), (3) pre-network permutation tests with the coefficient value as the  
438 test statistic, (4) pre-network permutation tests with the t statistic as the test statistic, and (5) double  
439 permutation tests with the coefficient as the test statistic. We extract  $\beta$  coefficients (slopes) and t  
440 statistics by fitting the model weighted degree ( $D$ )  $\sim$  trait ( $T$ ) using the `lm` function in R. We create the  
441 networks and conduct the pre-network permutation tests using the R package *asnipe* (Farine 2013).

442  
443 *Simulation 2: difference in group means*

444 We implement the second simulation using exactly the same code as Puga-Gonzalez, Sueur  
445 and Sosa (2020). In brief, these simulations start by assigning individuals to groups, with each group  
446 having a focal individual. Simulations can be run with and without a difference in gregariousness

447 among females and males, where females are more gregarious by being disproportionately allocated  
448 to larger groups when the effect is present. The simulations can also introduce an observation bias,  
449 whereby females are often not observed even when present, whereas males are always observed  
450 when present. Such biases are common in field studies—for example in a study on vulturine  
451 guineafowl (*Acryllium vulturinum*) (Papageorgiou *et al.* 2019), juveniles are marked with a soft wing  
452 tag on the right wing and therefore only identifiable if their right side is observable, whereas adults  
453 are marked with leg bands that can be identified from any direction. The code runs 500 simulations  
454 for each scenario (sex effect or not, observation bias present or not), with parameter values that are  
455 randomly drawn from uniform distributions as follows: population size ranging from 10 to 100,  
456 observation bias ranging from 0.5 to 1 (where 1 is always observed), the female sex ratio ranging  
457 from 0.2 to 0.8, and the number of focal follows ranging from 100 to 2000.

458 The simulation procedure above follows closely from the design in Farine (2017), and was  
459 designed to provide the ability to record both the pre-bias and post-bias effects, thereby allowing an  
460 estimation of false positives (when no effect should be present but one is detected), false negatives  
461 (when an effect is present, but masked by the observation bias, and therefore not detected), and  
462 whether the model can accurately estimate the original effect size (before the observation bias is  
463 applied). For each simulation, we calculate P values of the effect of sex on degree using (1) node  
464 permutation tests with the coefficient value as the test statistic, (2) pre-network permutation tests  
465 with the coefficient value as the test statistic, (3) pre-network permutation tests with the t statistic as  
466 the test statistic, and (4) double permutation tests with the coefficient as the test statistic. We extract  
467  $\beta$  coefficients (the difference in the mean degree between males and females) and t statistics by  
468 fitting the model weighted degree  $\sim$  sex in the lm function in R.

469

#### 470 *Model 3: edge-based regression*

471 We demonstrate that the double permutation method is robust to the presence of other  
472 social effects. To evaluate the impact of other social effects on error rates, we generate simulated  
473 networks in which individuals have three types of social associates: (i) weak associates, (ii) preferred  
474 associates, and (iii) strongly-bonded associates. We start (1) by creating a ‘real’ network comprised of  
475  $N$  individuals with a network density  $D$  drawn from a uniform distribution (ranging from 0.05 to 0.6),  
476 and selecting  $Z \times D$  edges (where  $Z$  is the maximum possible number of undirected edges) with  
477 probabilities 0.6, 0.3, and 0.1 for edge types 1 to 3, respectively (and all other edges set to 0). As with  
478 our first simulation, we then (2) make an average of  $K$  observations per individual. However, in the  
479 current simulation, we create  $1.2 \times \max(K_i)$  sampling periods (Whitehead 2008), and randomly  
480 allocate individuals to being observed in  $K_i$  of these sampling periods. (3) For each sampling period,  
481 we then select all pairs of individuals with an edge present in the real network and where both are  
482 present in that sampling period, and draw a 0 or 1 to signify whether they were observed together or  
483 not. Here we set the binomial probability of drawing a 1 set to 0.1 for edges of weak associates, 0.6  
484 for edges of preferred associates, and 0.9 for edges of strongly-bonded associates, based on the real  
485 network. These values therefore represent weak, strong, and very strong likelihoods of individuals  
486 being co-observed when they are both present. We select  $N$  and  $K$  values using the same parameter  
487 sets as in model 1.

488 Next, we (4) create a kinship network, setting the kinship level of each individual based on  
489 their edge type in the real network. Specifically, we draw relative kinship values from a beta  
490 distribution with  $\alpha = 1$  and  $\beta = 2$  (i.e. left-skewed) for missing edges and edges of weak associates,  
491  $\alpha = 2$  and  $\beta = 2$  (i.e. unskewed) for edges of preferred associates, and  $\alpha = 3$  and  $\beta = 2$  (i.e. right-  
492 skewed) for edges of strongly-bonded associates. Because beta distributions range from 0 to 1, these

493 distributions assume that 1 corresponds to the closest relatives in the population. We use these  
 494 parameters to create kinship distributions with differences in mean kinship (0.33, 0.5, 0.6,  
 495 respectively) according to social relationship type (these relative kinship values can be divided by two  
 496 to create a maximum kinship value of 0.5 with no effect on the outputs of the model).

497 Our simulations comprise two scenarios. In the first scenario, edge weights are purely social  
 498 and unrelated to kinship, which we achieve by randomizing the kinship matrix relative to the  
 499 association matrix after generating it (thereby keeping the same relationship between the variance in  
 500 the network edges and in the kinship matrix). In the second scenario, associations are kin-biased by  
 501 keeping the kinship matrix as it was generated, thus strongly-bonded associates have the highest  
 502 kinship on average and weak associates and non-associates (missing edges) have on average the  
 503 lowest kinship.

504 We simulate 100 replications for combinations of network sizes, with number of individuals  
 505 ranging from  $N = 5$  to  $N = 120$  and for the mean numbers of observations per individual ranging  
 506 from  $K = 5$  to  $K = 40$ . For each run of the simulation, we calculate P values of the effect of the trait  
 507 value on degree using (1) node permutation tests with the coefficient value as the test statistic, (2)  
 508 node permutation tests controlling for number of observations, (3) pre-network permutation tests  
 509 with the coefficient value as the test statistic, (4) pre-network permutation tests with the t statistic as  
 510 the test statistic, and (5) double permutation tests with the coefficient as the test statistic. We create  
 511 the networks, conduct the pre-network permutation tests, and conduct the regressions using the  
 512 MRQAP functionality in the R package *asnipe* (Farine 2013).

513  
 514

#### 515 THE DOUBLE PERMUTATION APPROACH IS ROBUST TO TYPE I AND TYPE II ERRORS

516

517 Our simulations confirm that when there are no effects ( $T_S = FALSE$  and  $L_S = FALSE$ ), pre-  
 518 network permutation tests are prone to elevated false positives (type I error rate of 26%, Figure S1,  
 519 Table 1), confirming previous studies. Our simulations also show that the tendency for pre-network  
 520 permutation tests to generate type I errors is greater in smaller networks and when more data are  
 521 collected (Figure S1). When the t value is used as a test statistic instead of the coefficient, pre-  
 522 network permutation tests are still prone to false positives (type I error rate of 14%, Table 1), and also  
 523 perform relatively poorly at detecting a real effect (detecting true effects approximately 20% less  
 524 often than other approaches, Figure S2, Table 1). The node permutation tests perform particularly  
 525 poorly when the effects are driven by non-social factors, such as variation in the spatial distribution  
 526 of individuals (type I error rate of 85%, Figure S3, Table 1). By contrast, double permutation tests  
 527 perform largely as expected throughout the parameter space, producing conservative P values when  
 528 no effect is present (type I error rate of 5%), reliably detecting effects when they were present (in line  
 529 with other tests, Table 1), and being much more conservative than other tests when the effect is  
 530 driven by non-social factors (type I error rate of 10%, Figures S1-S3, Table 1).

531  
 532

|                                            | No effects<br>( $T_S = FALSE$ and<br>$L_S = FALSE$ ) | Social effect<br>( $T_S = TRUE$ and<br>$L_S = FALSE$ ) | Spatial confound<br>( $T_S = TRUE$ and<br>$L_S = TRUE$ ) |
|--------------------------------------------|------------------------------------------------------|--------------------------------------------------------|----------------------------------------------------------|
| Node permutation ( $\beta$ )               | 4.9%                                                 | 84.8%                                                  | 84.9%                                                    |
| Node permutation<br>controlling for number | 5.1%                                                 | 87.3%                                                  | 87.8%                                                    |

|                                                     |             |              |             |
|-----------------------------------------------------|-------------|--------------|-------------|
| <b>of observations (<math>\beta</math>)</b>         |             |              |             |
| <b>Pre-network permutation (<math>\beta</math>)</b> | 26.3%       | <b>88.1%</b> | 22.9%       |
| <b>Pre-network permutation (t)</b>                  | 13.6%       | 62.9%        | 28.2%       |
| <b>Double permutation</b>                           | <b>5.1%</b> | <b>86.9%</b> | <b>9.9%</b> |

533

534

535

536

537

538

539

540

541

542

**Table 1. Propensity for permutation tests to yield errors or detect real effects when using regression models to test hypotheses on network data (model 1).** Table shows the proportion of statistically significant results for an effect of a trait on degree under three sets of scenarios. When  $T_S = FALSE$  and  $L_S = FALSE$ , the expected proportion of significant results should be approximately 5%. When  $T_S = TRUE$  and  $L_S = FALSE$ , the simulated data should have a strong social effect that, and most results should be significant. When both  $T_S = TRUE$  and  $L_S = TRUE$ , the simulated data should have a strong spatial ‘nuisance’ effect, with the local density of individuals varying across space, and the proportion of significant results should again approach 5%. Figures S1-S3 show how the proportion of significant results is affected by the number of observations and the number of nodes in the network. Bold values highlight test results that performed relatively well.

543

544

545

546

547

548

549

550

551

552

The problem of elevated error rates is not one of how the data are collected, but rather how the biological inference is drawn from a given dataset. To demonstrate this, we also show the applicability of our combined node permutation solution to data collected from focal observations. Puga-Gonzalez, Sueur and Sosa (2020) recently published the results from simulations (originally based on Farine 2017) showing that the same issue with pre-network permutations using group observations also exists for data collected using focal observations. By simulating scenarios combining both the presence/absence of an effect (females are more social) as well as the presence/absence of a strong observation bias (females are missed 20% of the time), Puga-Gonzalez, Sueur and Sosa (2020) also confirm that node permutations generate substantial rates of type I errors (false positives) when non-social nuisance effects are present.

553

554

555

556

557

558

559

560

561

562

563

Using the same simulation code, we show that our double permutation test performs well across all four scenario combinations (Table 2). It is a more conservative approach than pre-network permutation tests alone (remaining close to 5% false positives), performs adequately in terms of type II errors, for example by being less prone to nuisance effects when compared to node permutations.

Note that the true number of real positives is not actually known, and therefore the proportion of type II errors estimated by the simulations is likely to be over-inflated, as not all the simulations will have produced data with an effect present. Finally, because we use this simulation to explore effect size issues (see following section), we report the results of node permutations while controlling for the number of observations there.

|                                                     | No observation bias              |                                      | Observation bias (‘nuisance’ effect) |                                      |
|-----------------------------------------------------|----------------------------------|--------------------------------------|--------------------------------------|--------------------------------------|
|                                                     | Phenotypes equal (Type I errors) | Females more social (Type II errors) | Phenotypes equal (Type I errors)     | Females more social (Type II errors) |
| <b>Node permutation (<math>\beta</math>)</b>        | 4.6%                             | 2.4%                                 | 57.8%                                | 47.6%                                |
| <b>Pre-network permutation (<math>\beta</math>)</b> | 38.2%                            | 10.0%                                | 37.2%                                | 13.2%                                |
| <b>Pre-network permutation (t)</b>                  | 28.4%                            | 47.0%                                | 53.4%                                | 44.0%                                |
| <b>Double permutation</b>                           | 5%                               | 18.0%                                | 7.2%                                 | 24.4%                                |

564  
565  
566  
567  
568  
569  
570  
571  
572  
573  
574  
575  
576  
577  
578  
579  
580  
581  
582  
583  
584  
585  
586  
587  
588  
589  
590

**Table 2. Propensity for permutation tests to produce type I and type II errors from datasets simulating focal sampling (model 2).** Simulations use the code from Puga-Gonzalez, Sueur and Sosa (2020), that comprised four scenarios: (1) females and males have identical social phenotypes and are observed equally, (2) females are more social and both sexes are observed equally, (3) females and males have identical social phenotypes but observations are biased towards males (20% of observations of females are missed), and (4) females are more social but observations are biased towards males (20% of observations of females are missed). Using double permutation tests has relatively conservative type I and type II error rates across scenarios. False positives (type I errors) are near 5%, avoiding the high rates suffered by pre-network permutations alone and by node permutations in the presence of nuisance effects.

Finally, we show that the double permutation test is robust to the presence of nonrandom social structure (similar to a node permutation test). A number of social effects can simultaneously shape the structure of social networks (Figure 1), thereby increasing variance in both node-based metrics (e.g. degree) and edge-based metrics (e.g. edge weights). Such high variance can then lead to elevated type I error rates (Weiss *et al.* 2020). Simulations comprised two scenarios, testing the hypothesis that edge weights are predicted by kinship in networks where the association rates (edge weights) are related to kinship and in networks where they are not. As with the above two simulations, the double permutation test performs as expected when no real effect is present (i.e. type I error rates were close to 5%, Table 3). All models have elevated type II error rates because not all simulated networks result in a strong effect present, but the double permutation test performs more conservatively than node permutations (producing more type II errors, Table 3). While pre-network permutations appear to outperform other approaches with respect to Type II errors, this is likely because they are also more sensitive to weak effects in small networks, which are likely to correspond to type I errors rather than correctly identifying a true effect (see Figure S5, which shows higher rates of significant effects in small networks with high numbers of observations).

|                                     | Kinship $\neq$ Associations<br>(Type I errors) | Kinship $\propto$ Associations<br>(Type II errors) |
|-------------------------------------|------------------------------------------------|----------------------------------------------------|
| Node permutation ( $\beta$ )        | 5.1%                                           | 16.7%                                              |
| Pre-network permutation ( $\beta$ ) | 18.6%                                          | 9.9%                                               |
| Pre-network permutation ( $t$ )     | 3.0%                                           | 80.6%                                              |
| Double permutation                  | 5.2%                                           | 22.1%                                              |

591  
592  
593  
594  
595  
596  
597  
598

**Table 3. Propensity for permutation tests to produce type I and type II errors regarding kinship effects from simulated datasets with confounding social effects, i.e. nonrandom social structure (model 3).** Table shows the type I error rates in simulations where the social effect is a confound (i.e. strong associations are not linked to kinship), and estimated type II error rates in simulations where the social effect corresponds to the hypothesis being tested (i.e. strong associations are linked to kinship). Figures S4-S5 show how the proportion of significant results is affected by the number of observations and the number of nodes in the network.

599  
600  
601  
602

In summary, our results suggest that double permutation tests are most useful when sampling biases or other nuisance effects might be an issue, and especially when the impact of such effects are expected but not well understood. This method is an alternative to model-fitting methods, such as fitting generalized additive models that can handle non-linearity in the relationship between

603 sampling intensity and a network metric of interest (Franks *et al.* 2020). Some sampling biases (such  
604 as spatial variation in the proportion of individuals that can be identified) are quite complex to  
605 model. However, in situations where there is good reason to believe that network data are unbiased,  
606 node permutations (or restricted node permutations, see alternative approaches section) can  
607 perform well.

608

## 609 **THE CHALLENGE OF CALCULATING EFFECT SIZES**

610

611 Inference will always benefit from relying less on *P* values and instead focusing more on  
612 effect sizes (Nakagawa & Cuthill 2007). Franks *et al.* (2020) proposed that the coefficients of models  
613 can generate reliable relative effect sizes after controlling for the number of observations. However,  
614 multiple other nuisance effects can also create problems for estimating effect sizes and their  
615 significance. We explored this using the simulation of scenarios in which females are more social but  
616 also less observable (using Model 2). While the original coefficient (before the observation bias) and  
617 estimated coefficient (with the observation bias) were correlated ( $r=0.54$ ), controlling for the number  
618 of observations of each individual consistently inflated the estimated coefficient size (Figure S6). We  
619 tested whether regression models can recover the original coefficient value using two approaches to  
620 fitting the number of observations as a covariate. First, we used a naïve model, whereby the scaled  
621 number of observations is simply added as a covariate. Second, we used a more informed model  
622 whereby the number of observations is added as an interaction with the effect of sex (exploration of  
623 the data would show that the number of observations differs between sexes). The naïve model  
624 performed worse, producing estimated effect sizes that were on average 1.8 times the original value  
625 (and up to 5.1 times the original value). Correctly fitting observations as an interaction term did not  
626 dramatically improve this, with the average estimated coefficient values being 1.7 times the original  
627 value (and up to 3.3 times the original). These two models performed even worse at estimating effect  
628 sizes when the true effect was not present (the estimated effect sizes were on average over 250 times  
629 the true values, Figure S7).

630 One reason why the models could not generate robust effect sizes is because the models do  
631 not deal well with correcting data in situations where individuals are observed in groups rather than  
632 in pairs. For group observations, the loss of each observation can result in a variable number of edges  
633 being removed, with variation occurring both within groups (missing one individual from a group of  
634 10 will reduce its degree by 9 units whereas others' degree will only reduce by 1 unit) and between  
635 groups (missing one individual will result in a larger loss of edges in a larger group than in a small  
636 group). Given our findings, approaches to estimating corrected effect sizes should be carefully tested  
637 before being used. Estimating effect sizes in the presence of bias is a major priority in the continued  
638 development of robust tools for animal social network analysis.

639

640

## 641 **ALTERNATIVE APPROACHES**

642

643 While our double permutation test performs similarly, and generally better, than the single  
644 permutation procedures across a range of scenarios, many alternative approaches or methodological  
645 refinements can improve the robustness of inferences from hypothesis testing. Here we discuss some  
646 alternative and/or further approaches.

647 For many studies, it may not be necessary to use a double permutation test. It will often be  
648 sufficient to use node permutations and control for nuisance effects by restricting which individuals'

649 data are swapped when performing the randomization. Such restricted node permutations are useful  
650 if individuals can be easily allocated to a distinct spatial location, or if there are clear categories of  
651 individuals that correspond to biases. For example, if individual animals enter the study in distinct  
652 waves, because of a standard dispersal time or because a study expanded at some point to include  
653 new individuals, then node permutations could be restricted among individuals entering the study at  
654 approximately the same time. However, if multiple factors have to be accounted for, one can rapidly  
655 run out of sets of individuals to swap. For example, a study population comprising 40 individuals that  
656 aims to restrict swaps by two parameters (e.g. age and location) would have on average only 10  
657 individuals per class if these are binary, only 6-7 per class if one is trinary, and only 4-5 per class if  
658 both are trinary.

659 Another approach is to explicitly estimate the uncertainty of the combination of a given  
660 dataset and hypothesis-testing method. The procedure we used here—simulating a random trait  
661 value for each node in a network and running through the full hypothesis-testing procedure—can be  
662 a straightforward way of characterising the robustness of any given study’s results. That is, one can  
663 explore how sensitive a given dataset is to generating false positives or false negatives under different  
664 hypothesis-testing approaches. This procedure simply involves generating a random trait variable  
665 (e.g. drawing a trait value from a normal distribution) and testing how this value corresponds to the  
666 metric of interest from the observed network using the same code as for the real variable(s) being  
667 studied. By repeating this procedure many times, the proportion of the tests that produce a  
668 significant P value can be reported. It is worth exploring if and how this study-specific information  
669 might be used. For example, one might be able to correct the threshold for rejecting the null  
670 hypothesis to the point where the expected false positive rate will be 5%. Shuffling the actual node  
671 values (even doing so within space or time) and repeatedly running pre-network permutation tests  
672 might provide an even more precise estimation of the true false positive rate, as it will be fully  
673 conditioned on the real observation data.

674 Rather than testing one null hypothesis, which encourages confirmation bias, the principle of  
675 strong inference (Platt 1964) requires considering and testing multiple alternative hypotheses. One  
676 criticism of null hypothesis testing using permutation tests is that they do not provide an exhaustive  
677 exclusion of alternative explanations (Zhang 2020). However, this apparent weakness can be turned  
678 into a strength if multiple models are used to collectively examine the different processes that might  
679 be shaping the patterns present in observation data. The use of multiple permutation-based null  
680 models can therefore be highly informative. For example, while it is important to control for the  
681 contribution of ‘nuisance’ spatial effects to social network structure when testing hypotheses about  
682 social decision-making, how animals use space (and its links to social structure) is itself an important  
683 biological process (Webber & Vander Wal 2018; He, Maldonado-Chaparro & Farine 2019). We show  
684 an example of this in Figure 3, where both social and spatial processes shape the differences in the  
685 group sizes of males and females, and where pre-network permutations that control for space would  
686 discard the biological drivers of space use (and, consequently, group size) as a nuisance effect. Aplin  
687 *et al.* (2015) evaluated the extent that the spatial distribution of individuals contributed towards their  
688 repeatability in social network metrics by reporting the distribution of repeatability values from a  
689 spatially-constrained permutation test. Farine *et al.* (2015) used two different permutation tests to  
690 identify the expected effects of individuals choosing social groups versus choosing habitats. Such an  
691 approach can characterise the relative drivers of apparent gregariousness among males and females  
692 in Figure 3. Hobson, Monster and Dedeo (2019) permuted observations of dominance interactions  
693 and then used the direction of the deviations from null expectations for inferring the likelihood of



694 different dominance strategies, such as individuals that preferentially attacked groupmates that were  
695 closer in rank (targeting close competitors) or farther in rank (bullying weaker opponents).

696 Another approach that is often considered to be useful for estimating uncertainty (e.g.  
697 confidence interval around effect sizes) is bootstrapping (Lusseau, Whitehead & Gero 2008; Farine &  
698 Strandburg-Peshkin 2015; Bonnell & Vilette 2020). Bootstrapping involves resampling the observed  
699 data with replacement to create new datasets of the same size as the original. This procedure can  
700 estimate the range of values that a given statistic can take, and whether the estimate overlaps with  
701 an expected null value (see Puth, Neuhauser & Ruxton 2015). Bootstrapping, however, is not always  
702 appropriate as a means of hypothesis testing in animal social networks, because like node  
703 permutations, it relies on resampling the observed data, under the assumption that the observed  
704 network reflects the true social structure. For example, missing edges in an association network  
705 represent an association rate of zero, but in reality these zero values could be weak associations that  
706 exist in the real world, but were simply never observed. Bootstrapping the edge weights incorrectly  
707 suggests that unobserved edges have no uncertainty, which is obviously false for most studies. Thus,  
708 bootstrapping social network data should only be used with care and for specific aims.

709 Several other methods that do not rely on permutation tests have been proposed to deal  
710 with sampling biases when constructing networks or to deal with non-independence of data to test  
711 hypotheses. For example, Gimenez *et al.* (2019) propose using capture-recapture models to explicitly  
712 model heterogeneity in detections, thereby providing more accurate estimates of network metrics.  
713 Studies estimating phenotypic variance using animal models have also proposed methods to  
714 decompose multiple sources driving between-individual variation in trait values (Thomson *et al.*  
715 2018). Such multi-matrix models have recently been applied to animal social networks as a means of  
716 identifying the relative importance of different predictors in driving differences in social network  
717 metrics (Albery *et al.* 2020).

718 Pre-network permutation tests were initially designed to evaluate whether the social  
719 structure of a population is non-random, given sparse association data (Bejder, Fletcher & Brager  
720 1998). However, as shown by recent studies (Weiss *et al.* 2020; Puga-Gonzalez *et al.* 2020), and our  
721 own, producing reliable tests of some hypotheses can predictably degrade as the size of the  
722 observational dataset increases (Figure S1, for the reasons outlined in Figure 2). With rich datasets,  
723 however, it becomes possible to create replicated networks (Hobson, Avery, & Wright, 2013). That is,  
724 the data can be split to produce multiple networks (without overlapping observations), where each  
725 network contains sufficient data to produce reliable estimates of network structure (Farine, 2018).  
726 The same hypothesis-testing procedure can then be applied to each network independently. Using  
727 emerging methods for automated tracking, social networks can be created for each season (e.g.  
728 Papageorgiou *et al.* 2019), across periods of several days (e.g. Dakin *et al.* 2019), for each day (e.g.  
729 Boogert, Farine & Spencer 2014), or right down to each second (e.g. Blonder & Dornhaus 2011). If  
730 these networks produce consistent results when tested independently, this provides much stronger  
731 support for a given hypothesis than any single network. Alternatively, waxing and waning of effects  
732 might suggest some underlying dynamics are present that warrant further investigation, more careful  
733 analyses, or longer periods for each replication. Any inference becomes stronger again if each of the  
734 replicate social networks contains different sets of individuals, and the networks are re-formed in  
735 each sample period, as for instance when networks represent spatial proximity in roosts after  
736 individuals come back together to sleep or rest after having foraged or moved individually (Ripperger  
737 *et al.* 2019). Given sufficient data, many networks could be combined by using tools from meta-  
738 analyses to estimate an overall effect size. However, such an approach would need to ensure that the  
739 same biases don't impact each of the networks in the same way.

740           Although within-study replication can improve our confidence in a given result, ultimately the  
741 gold standard is replication across studies. Within-study replications cannot control for many of the  
742 nuances in how data are collected, stored, and analysed. One example of a replication study tested  
743 the effects of developmental conditions on the social network position of juvenile zebra finches  
744 (*Taeniopygia guttata*). In the original study (Boogert, Farine & Spencer 2014), birds were given either  
745 stress hormone or control treatments as nestlings, and their social relationships were studied after  
746 they became nutritionally independent from their parents. In the replication study (Brandl *et al.*  
747 2019), clutch sizes of wild zebra finches were manipulated to experimentally increase or decrease  
748 sibling competition (a source of developmental stress), and social associations (in the wild) were  
749 recorded after birds fledged. Across both studies, 9 out of 10 hypothesized effects had the same  
750 result (i.e. both statistically significant or not), and all 10 of the differences were in the same direction  
751 (binomial  $P < 0.0001$ ).

752  
753

## 754 **POTENTIAL IMPROVEMENTS**

755

756           There are many further directions that can be explored for the double-permutation test.  
757 While we have demonstrated that our method performs adequately across a range of scenarios using  
758 simulated data, it is not always possible to simulate all possible types of uncertainty that might exist  
759 in empirical datasets. For example, the median expected value might not effectively represent the  
760 value expected by the null hypothesis, because when the possible configurations of the data are  
761 severely limited (for instance by a small sample size of observations per individual), the resulting  
762 distribution of expected metric values might not be unimodal. For example, if individuals have strong  
763 group size preferences, then their expected degree might jump dramatically from their preferred  
764 values to the distribution of mean degrees from the population, as more and more swaps are made.  
765 It can therefore be useful to visualize the expected distributions of metric values across individuals  
766 when possible, and to remove individuals that have been under-sampled (Farine & Strandburg-  
767 Peshkin 2015).

768           Rather than using a single value (such as the median, see Figure 4), future studies could  
769 explore ways of carrying over uncertainty from the distribution of permutation values when  
770 calculating the corrected test statistic. For example, one could use a Monte Carlo approach that  
771 repeatedly samples from the distribution of permuted values when calculating the residual for each  
772 unit in the analysis (each node or each edge), and using these many measurements to estimate the  
773 95% range of the corrected test statistic. An alternative way of carrying uncertainty through the  
774 analysis could be to implement a Bayesian framework for inferring the network (Farine & Strandburg-  
775 Peshkin 2015), or even to modelling the dynamic process of the observations of connections in the  
776 network (Koskinen & Snijders 2007). Thus, there remains significant grounds for continued  
777 improvements in the methods for conduction hypothesis testing using animal social network data.

778           For many studies, it is important to not only test a hypothesis of interest but also to  
779 accurately estimate the connection strength between individuals. One method that has been  
780 proposed are generalized affiliation indices (Whitehead & James 2015). These involve regressing the  
781 observed association strength against nuisance factors (such as home-range overlap) to generate a  
782 corrected value that accounts for the opportunity to associate. Permutation tests have also been  
783 suggested as a means of identifying non-random preferred or avoided relationships (Whitehead,  
784 Bejder & Ottensmeyer 2005). Yet, it remains to be determined whether permutation tests could also  
785 provide more accurate estimates of the strength of each relationship. Following our methods, it could

786 be possible to estimate a corrected association (or interaction) strength by subtracting some measure  
787 of the distribution of permuted values from the observed value of each edge.

788

789

## 790 **CONCLUSIONS**

791

792 In this paper, we have revisited some of the factors that can raise problems when conducting  
793 hypothesis testing using animal social network data, highlighting the need for more robust methods.  
794 By combining the strengths of two randomisation routines, we developed an approach that does not  
795 suffer from elevated false positives and suffers relatively little from false negatives. However, our  
796 proposed solution, or the use of permutation tests more generally, does not negate the need to  
797 carefully consider statistical issues that have been highlighted for more orthodox statistical practices  
798 (Forstmeier, Wagenmakers & Parker 2017). For example, the common practice of using linear models  
799 for both data exploration and hypothesis testing are estimated to produce rates of type I error as high  
800 as 40% (Forstmeier & Schielzeth 2011). High false discovery rates can also be caused by choosing an  
801 incorrect model structure (e.g. by failing to fit random slopes to a mixed effects model, see Schielzeth  
802 & Forstmeier 2009), which could also be applicable to the method used when calculating a test  
803 statistic for use with a permutation test. In general, false positive rates are likely to increase with the  
804 complexity of the question and the dataset, and dealing with empirical datasets in the biological  
805 sciences often requires making complex decisions for which the solutions aren't clear—such as  
806 whether to log-transform data (Ives 2015) or not (O'Hara & Kotze 2010). In the context of social  
807 network data, different permutation procedures (including constricting the same test in different  
808 ways) each test quite a specific null hypothesis (see Figure 3 for an example), so part of statistical  
809 considerations should include ensuring that the correct null hypothesis is being tested.

810 One particularly important point that our work, and that of others (e.g. Franks *et al.* 2020),  
811 highlights is the need to pay particularly close attention to the importance of different processes for a  
812 given hypothesis of interest. Take, for example, variation in space use and corresponding differences  
813 in the local density of individuals. If we assume that space use is constrained by non-social factors,  
814 and if we aim to understand animal social decisions, then space use (and its consequences for  
815 density) could be considered a nuisance effect. However, if we aim to study the transmission of  
816 information or pathogens, then these same effects are now an important factors contributing to the  
817 outcome of the transmission process. Thus, a given factor might represent a nuisance effect for one  
818 question but not another, even if these factors represent two halves of the same feedback loop  
819 (Cantor *et al.* 2019). Unfortunately, a major challenge remains in estimating the importance of effect  
820 sizes, in the presence of nuisance effects, when using animal social network data.

821 Using three different simulations, each including multiple scenarios, we have shown that pre-  
822 network permutation tests can produce reliable results when combined with node permutations to  
823 form a double permutation test. In contrast to parametric approaches (or drawing heavily from these  
824 when producing a test statistic), they can control for a large range of nuisance effects without  
825 implementing complex model structures, measuring and controlling for every source of bias, or  
826 assessing the consequences of deviating from parametric model assumptions. Further, they avoid  
827 making assumptions that the observed network corresponds exactly to the true network. Using  
828 permutation tests requires and encourages researchers to focus on thinking carefully about what  
829 specific processes may have produced the patterns in a given observed dataset. One can use a range  
830 of permutation tests to evaluate the relative contribution of different processes by measuring the

831 relative deviations of the data away from their null expectations. The strength and robustness of  
832 permutation tests therefore lies in their flexibility and simplicity.

833

834

### 835 **ACKNOWLEDGEMENTS**

836

837 We thank the Farine lab, Josh Firth, Matt Silk, Michael Weiss, Dan Franks, and the many researchers  
838 who contacted the authors with questions, for helpful comments, insights, and discussions regarding  
839 the issues presented in this paper. DRF was funded by the Max Planck Society and a grant from the  
840 European Research Council (ERC) under the European Union's Horizon 2020 research and innovation  
841 programme (grant agreement No. 850859). DRF received additional from the Deutsche  
842 Forschungsgemeinschaft (DFG, German Research Foundation) under Germany's Excellence Strategy –  
843 EXC 2117 – 422037984.

844

### 845 **CODE AVAILABILITY**

846

847 Code for simulation models 1 to 3 is available here:

848 <https://owncloud.gwdg.de/index.php/s/93zgi9tiKlu5Grr>

849

### 850 **REFERENCES**

851

852 Alarcón-Nieto, G., Graving, J.M., Klarevas-Irby, J.A., Maldonado-Chaparro, A.A., Mueller, I. & Farine, D.R. (2018)  
853 An automated barcode tracking system for behavioural studies in birds. *Methods in Ecology and*  
854 *Evolution*, **9**, 1536-1547.

855 Albery, G.F., Morris, A., Morris, S., Pemberton, J.M., Clutton-Brock, T.H., Nussey, D.H. & Firth, J.A. (2020) Spatial  
856 point locations explain a range of social network positions in a wild ungulate. *bioRxiv*,  
857 <https://doi.org/10.1101/2020.1106.1104.135467>.

858 Aplin, L.M., Firth, J.A., Farine, D.R., Voelkl, B., Crates, R.A., Culina, A., Garroway, C.J., Hinde, C.A., Kidd, L.R.,  
859 Psorakis, I., Milligan, N.D., Radersma, R., Verhelst, B. & Sheldon, B.C. (2015) Consistent individual  
860 differences in the social phenotypes of wild great tits (*Parus major*). *Animal Behaviour*, **108**, 117-127.

861 Bejder, L., Fletcher, D. & Brager, S. (1998) A method for testing association patterns of social animals. *Animal*  
862 *Behaviour*, **56**, 719-725.

863 Blonder, B. & Dornhaus, A. (2011) Time-Ordered Networks Reveal Limitations to Information Flow in Ant  
864 Colonies. *Plos One*, **6**.

865 Bonnell, T.R. & Vilette, C. (2020) Constructing and analysing time-aggregated networks: The role of  
866 bootstrapping, permutation and simulation. *Methods in Ecology and Evolution*, **in press**.

867 Boogert, N.J., Farine, D.R. & Spencer, K.A. (2014) Developmental stress predicts social network position. *Biology*  
868 *Letters*, **10**, 20140561.

869 Brandl, H.B., Farine, D.R., Funghi, C., Schuett, W. & Griffith, S.C. (2019) Early-life social environment predicts  
870 social network position in wild zebra finches. *Proceedings of the Royal Society B-Biological Sciences*,  
871 **286**.

872 Cantor, M., Maldonado-Chaparro, A., Beck, K., Carter, G.G., He, P., Hilleman, F., Klarevas-Irby, J.A., Lang, S.D.J.,  
873 Ogino, M., Papageorgiou, D., Prox, L. & Farine, D.R. (2019) Animal social networks: revealing the causes  
874 and implications of social structure in ecology and evolution. *EcoEvoRxiv*,  
875 <https://doi.org/10.32942/osf.io/m62gb>.

876 Crall, J.D., Gravish, N., Mountcastle, A.M. & Combes, S.A. (2015) BEETag: A Low-Cost, Image-Based Tracking  
877 System for the Study of Animal Behavior and Locomotion. *Plos One*, **10**, e0136487.

878 Croft, D.P., Madden, J.R., Franks, D.W. & James, R. (2011) Hypothesis testing in animal social networks. *Trends in*  
879 *Ecology & Evolution*, **26**, 502-507.

880 Dakin, R., Moore, I.T., Horton, B.M., Vernasco, B.J. & Ryder, T.B. (2019) Testosterone-mediated behavior shapes  
881 the emergent properties of social networks. *bioRxiv*, **10.1101/737650**.

882 Davis, G.H., Crofoot, M.C. & Farine, D.R. (2018) Estimating the robustness and uncertainty of animal social  
883 networks using different observer methods. *Animal Behaviour*, **141**, 29-44.

- 884 Farine, D.R. (2013) Animal Social Network Inference and Permutations for Ecologists in R using asnipe. *Methods*  
885 *in Ecology and Evolution*, **4**, 1187–1194.
- 886 Farine, D.R. (2017) A guide to null models for animal social network analysis. *Methods in Ecology and Evolution*,  
887 **8**, 1309-1320.
- 888 Farine, D.R. & Aplin, L.M. (2019) Spurious inference when comparing networks. *Proceedings of the National*  
889 *Academy of Sciences of the United States of America*, **116**, 16674-16675.
- 890 Farine, D.R., Firth, J.A., Aplin, L.M., Crates, R.A., Culina, A., Garroway, C.J., Hinde, C.A., Kidd, L.R., Milligan, N.D.,  
891 Psorakis, I., Radersma, R., Verhelst, B., Voelkl, B. & Sheldon, B.C. (2015) The role of social and  
892 ecological processes in structuring animal populations: a case study from automated tracking of wild  
893 birds. *Royal Society Open Science*, **2**, 150057.
- 894 Farine, D.R. & Strandburg-Peshkin, A. (2015) Estimating uncertainty and reliability of social network data using  
895 Bayesian inference. *Royal Society Open Science*, **2**, 150367.
- 896 Farine, D.R. & Whitehead, H. (2015) Constructing, conducting, and interpreting animal social network analysis.  
897 *Journal of Animal Ecology*, **84**, 1144-1163.
- 898 Firth, J.A., Cole, E.F., Ioannou, C.C., Quinn, J.L., Aplin, L.M., Culina, A., McMahon, K. & Sheldon, B.C. (2018)  
899 Personality shapes pair bonding in a wild bird social system. *Nature Ecology & Evolution*, **2**, 1696-1699.
- 900 Forstmeier, W. & Schielzeth, H. (2011) Cryptic multiple hypotheses testing in linear models: overestimated  
901 effect sizes and the winner's curse. *Behavioral Ecology and Sociobiology*, **65**, 47-55.
- 902 Forstmeier, W., Wagenmakers, E.J. & Parker, T.H. (2017) Detecting and avoiding likely false-positive findings - a  
903 practical guide. *Biological Reviews*, **92**, 1941-1968.
- 904 Franks, D.W., Weiss, M.N., Silk, M.J., Perryman, R.J.Y. & Croft, D.P. (2020) Calculating effect sizes in animal social  
905 network analysis. *Methods in Ecology and Evolution*, **10.1111/2041-210X.13429**.
- 906 Gimenez, O., Mansilla, L., Klaich, M.J., Coscarella, M.A., Pedraza, S.N. & Crespo, E.A. (2019) Inferring animal  
907 social networks with imperfect detection. *Ecological Modelling*, **401**, 69-74.
- 908 He, P., Maldonado-Chaparro, A. & Farine, D.R. (2019) The role of habitat configuration in shaping social  
909 structure: a gap in studies of animal social complexity. *Behavioral Ecology and Sociobiology*, **9**.
- 910 Hobson, E.A., Monster, D. & Dedeo, S. (2019) Strategic heuristics underlie animal dominance hierarchies and  
911 provide evidence of group-level social knowledge. *arXiv*.
- 912 Ives, A.R. (2015) For testing the significance of regression coefficients, go ahead and log-transform count data.  
913 *Methods in Ecology and Evolution*, **6**, 828-835.
- 914 Koskinen, J.H. & Snijders, T.A.B. (2007) Bayesian inference for dynamic social network data. *Journal of Statistical*  
915 *Planning and Inference*, **137**, 3930-3938.
- 916 Langen, T.A. (1996) Social learning of a novel foraging skill by white-throated magpie-jays (*Calocitta formosa*,  
917 *Corvidae*): A field experiment. *Ethology*, **102**, 157-166.
- 918 Lantz, B. (2013) The large sample size fallacy. *Scandinavian Journal of Caring Sciences*, **27**, 487-492.
- 919 Leedale, A.E., Sharp, S.P., Simeoni, M., Robinson, E.J.H. & Hatchwell, B. (2018) Fine-scale genetic structure and  
920 helping decisions in a cooperatively breeding bird. *Molecular Ecology*, **27**, 1714-1726.
- 921 Lusseau, D., Whitehead, H. & Gero, S. (2008) Incorporating uncertainty into the study of animal social networks.  
922 *Animal Behaviour*, **75**, 1809-1815.
- 923 Nakagawa, S. & Cuthill, I.C. (2007) Effect size, confidence interval and statistical significance: a practical guide  
924 for biologists. *Biological Reviews*, **82**, 591-605.
- 925 O'Hara, R.B. & Kotze, D.J. (2010) Do not log-transform count data. *Methods in Ecology and Evolution*, **1**, 118-  
926 122.
- 927 Papageorgiou, D., Christensen, C., Gall, G.E., Klarevas-Irby, J.A., Nyaguthii, B., Couzin, I.D. & Farine, D.R. (2019)  
928 The multilevel society of a small-brained bird. *Current Biology*, **29**, R1120-R1121.
- 929 Platt, J.R. (1964) Strong Inference. *Science*, **146**, 347-353.
- 930 Puga-Gonzalez, I., Sueur, C. & Sosa, S. (2020) Null models for animal social network analysis and data collected  
931 via focal sampling: Pre-network or node network permutation? *Methods in Ecology and Evolution*,  
932 **10.1111/2041-210X.13400**.
- 933 Puth, M.T., Neuhauser, M. & Ruxton, G.D. (2015) On the variety of methods for calculating confidence intervals  
934 by bootstrapping. *Journal of Animal Ecology*, **84**, 892-897.
- 935 Ripperger, S.P., Carter, G.G., Duda, N., Koelpin, A., Cassens, B., Kapitza, R., Josic, D., Berrio-Martinez, J., Page,  
936 R.A. & Mayer, F. (2019) Vampire Bats that Cooperate in the Lab Maintain Their Social Networks in the  
937 Wild. *Current Biology*, **29**, 4139-+.
- 938 Ripperger, S.P., Carter, G.G., Page, R.A., Duda, N., Koelpin, A., Weigel, R., Hartmann, M., Nowak, T., Thielecke, J.,  
939 Schadhauer, M., Robert, J., Herbst, S., Meyer-Wegener, K., Wagemann, P., Schroder-Preikschat, W.,  
940 Cassens, B., Kapitza, R., Dressler, F. & Mayer, F. (2020) Thinking small: Next-generation sensor networks  
941 close the size gap in vertebrate biologging. *Plos Biology*, **18**.

- 942 Ryder, T.B., Horton, B.M., van den Tillaart, M., Morales, J.D. & Moore, I.T. (2012) Proximity data-loggers increase  
943 the quantity and quality of social network data. *Biology Letters*, **8**, 917-920.
- 944 Schielzeth, H. & Forstmeier, W. (2009) Conclusions beyond support: overconfident estimates in mixed models.  
945 *Behavioral Ecology*, **20**, 416-420.
- 946 Szucs, D. & Ioannidis, J.P.A. (2017) When Null Hypothesis Significance Testing Is Unsuitable for Research: A  
947 Reassessment. *Frontiers in Human Neuroscience*, **11**.
- 948 Thomson, C.E., Winney, I.S., Salles, O.C. & Pujol, B. (2018) A guide to using a multiple-matrix animal model to  
949 disentangle genetic and nongenetic causes of phenotypic variance. *Plos One*, **13**.
- 950 Webber, Q.M.R. & Vander Wal, E. (2018) An evolutionary framework outlining the integration of individual  
951 social and spatial ecology. *Journal of Animal Ecology*, **87**, 113-127.
- 952 Weiss, M.N., Franks, D.W., Brent, L.J.N., Ellis, S., Silk, M.J. & Croft, D.P. (2020) Common datastream permutations  
953 of animal social network data are not appropriate for hypothesis testing using regression models.  
954 *bioRxiv*, **10.1101/2020.04.29.068056**.
- 955 Whitehead, H. (2008) *Analyzing animal societies*. University of Chicago Press, Chicago, USA.
- 956 Whitehead, H., Bejder, L. & Ottensmeyer, C.A. (2005) Testing association patterns: issues arising and extensions.  
957 *Animal Behaviour*, **69**, e1-e6.
- 958 Whitehead, H. & James, R. (2015) Generalized affiliation indices extract affiliations from social network data.  
959 *Methods in Ecology and Evolution*, **6**, 836-844.
- 960 Zhang, M.J. (2020) The use and limitations of null-model-based hypothesis testing. *Biology & Philosophy*, **35**.
- 961
- 962
- 963

964 APPENDIX  
965

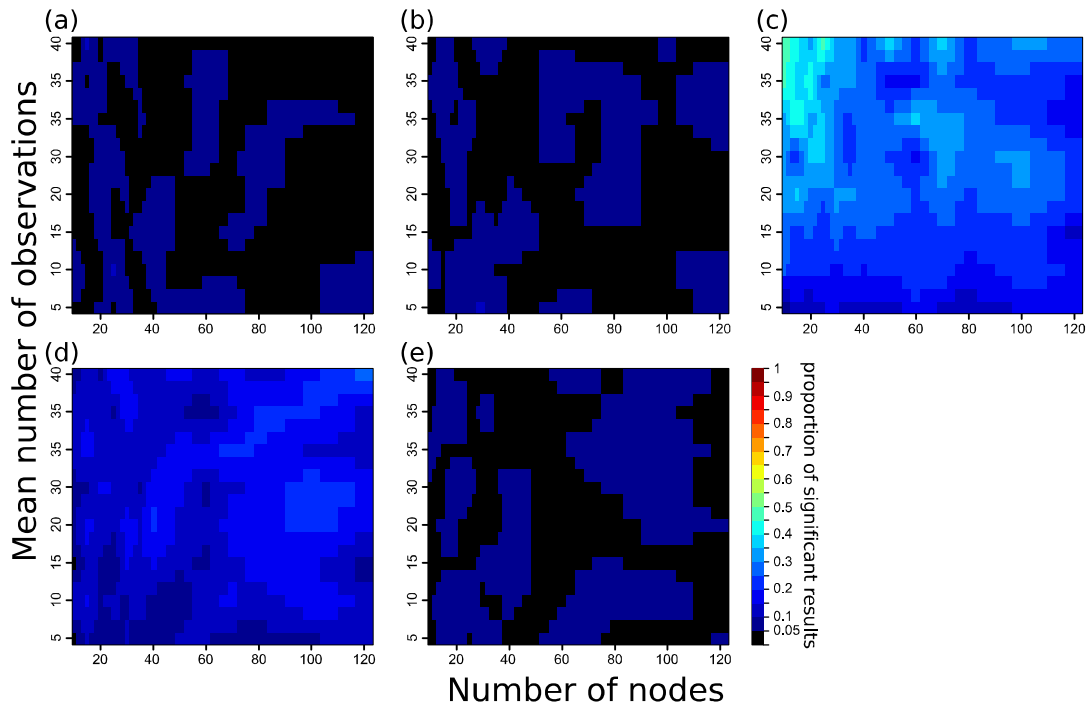

966  
967  
968 **Figure S1. Proportions of statistically significant results for differently-sized networks and different observation efforts for**  
969 **simulation 1 under the scenario when  $T_S = FALSE$  (no effect is present) and  $L_S = FALSE$  (individuals are not**  
970 **preferentially located in different patches).** Panels represent the P values calculated using (a) node permutation tests with  
971 the coefficient value as the test statistic, (b) node permutation tests controlling for number of observations, (c) pre-network  
972 permutation tests with the coefficient value as the test statistic, (d) pre-network permutation tests with the t statistic as the  
973 test statistic, and (e) double permutation tests with the coefficient as the test statistic. These results highlight the propensity  
974 for pre-network permutation tests (c) to produce spurious results when networks have few nodes but many observations  
975 (top left of the plot).  
976  
977

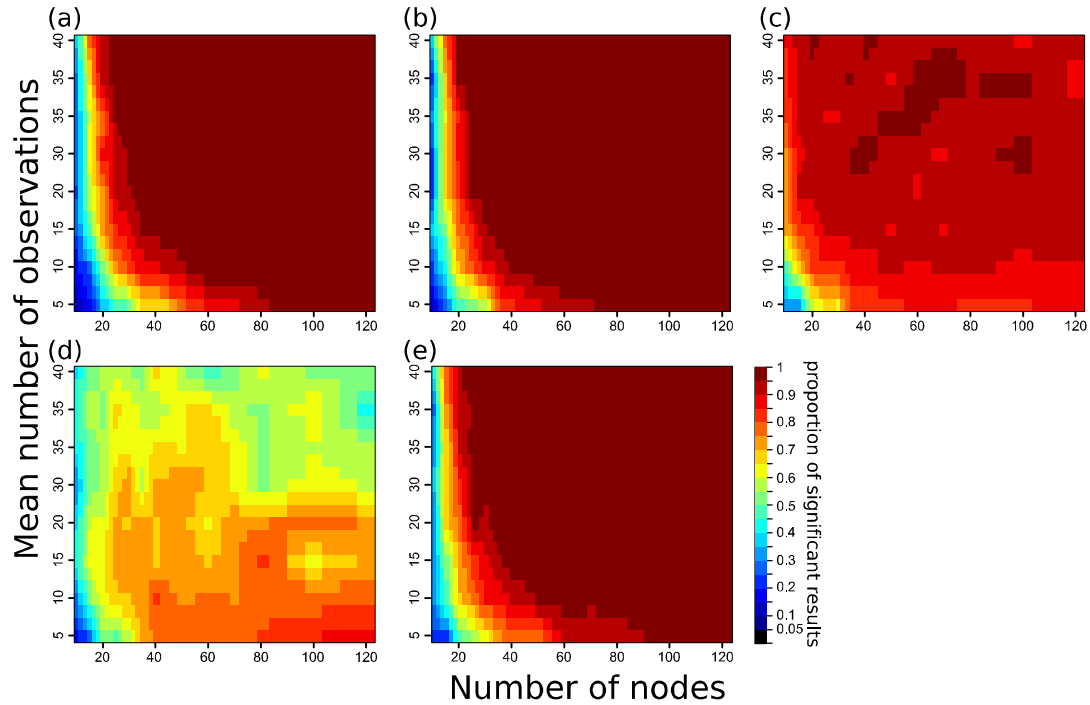

978  
979  
980  
981  
982  
983  
984  
985  
986  
987  
988  
989  
990

**Figure S2. Proportions of statistically significant results for differently-sized networks and different observation efforts for simulation 1 under the scenario when  $T_S = TRUE$  (an effect is present) and  $L_S = FALSE$  (the effect is not a spatial confound).** Panels represent the P values calculated using (a) node permutation tests with the coefficient value as the test statistic, (b) node permutation tests controlling for number of observations, (c) pre-network permutation tests with the coefficient value as the test statistic, (d) pre-network permutation tests with the t statistic as the test statistic, and (e) double permutation tests with the coefficient as the test statistic. These results highlight the propensity for pre-network permutation tests (c) to be more likely to produce significant results when networks have few nodes but many observations (left-hand of the plot relative to panels a, b and e). Further, results show that using the t statistic (d) produces unreliable results (i.e. the significance does not increase when more observations are made).



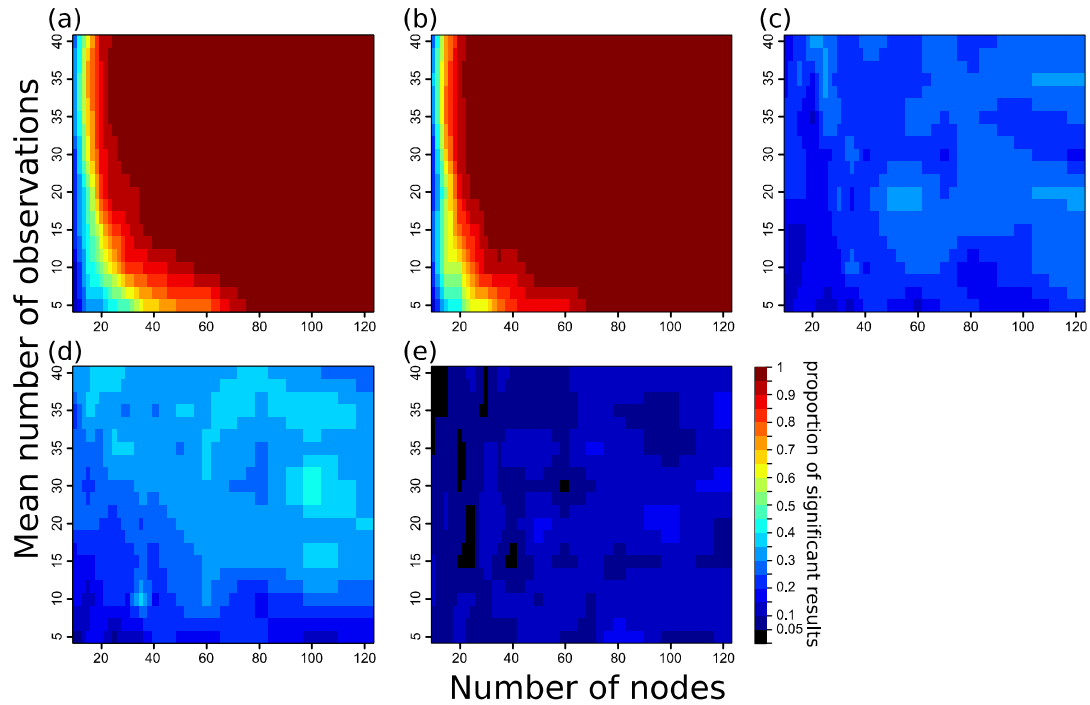

991  
992  
993  
994  
995  
996  
997  
998  
999  
1000

**Figure S3. Proportions of statistically significant results for differently-sized networks and different observation efforts for simulation 1 under the scenario when  $T_S = TRUE$  (an effect is present) and  $L_S = TRUE$  (the effect is a spatial confound).** Panels represent the P values calculated using (a) node permutation tests with the coefficient value as the test statistic, (b) node permutation tests controlling for number of observations, (c) pre-network permutation tests with the coefficient value as the test statistic, (d) pre-network permutation tests with the t statistic as the test statistic, and (e) double permutation tests with the coefficient as the test statistic. These results highlight the poor performance of node permutation-based models (panels a and b).

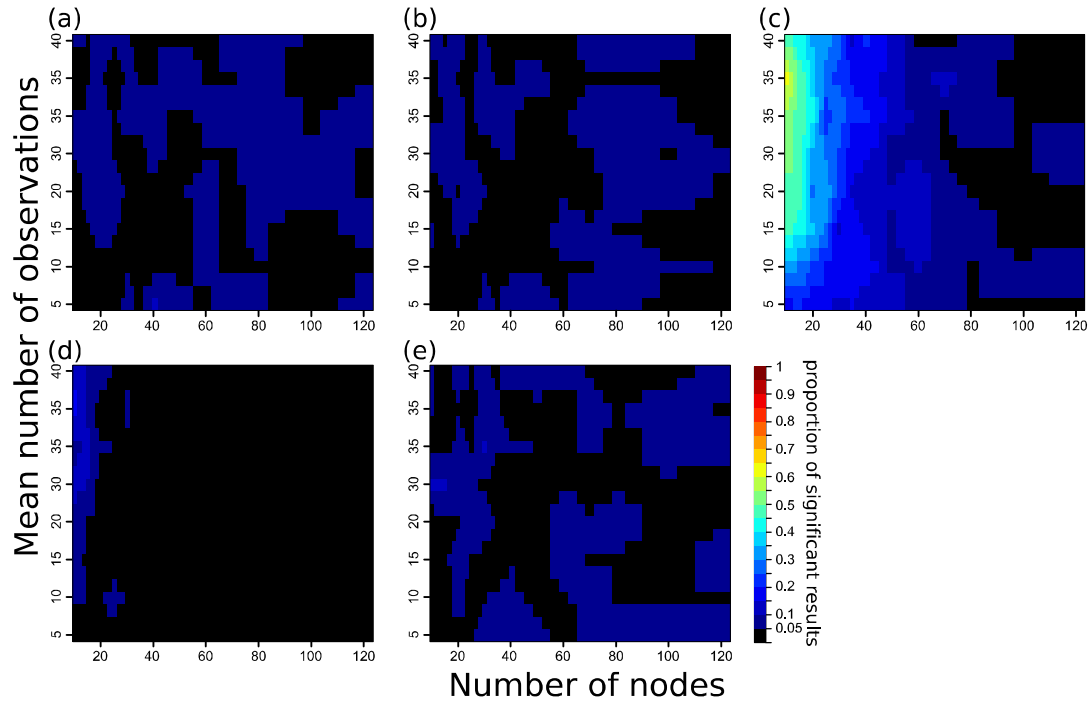

1001  
1002  
1003  
1004  
1005  
1006  
1007  
1008  
1009  
1010

**Figure S4. Proportions of statistically significant results for differently-sized networks and different observation efforts for simulation 3 under the scenario where kinship does not predict association rates (edge weights).** Panels represent the P values calculated using (a) node permutation tests with the coefficient value as the test statistic, (b) node permutation tests controlling for number of observations, (c) pre-network permutation tests with the coefficient value as the test statistic, (d) pre-network permutation tests with the t statistic as the test statistic, and (e) double permutation tests with the coefficient as the test statistic. These results highlight the propensity for pre-network permutation tests (c) to produce spurious results when networks have few nodes present (left-hand-side of the plot).

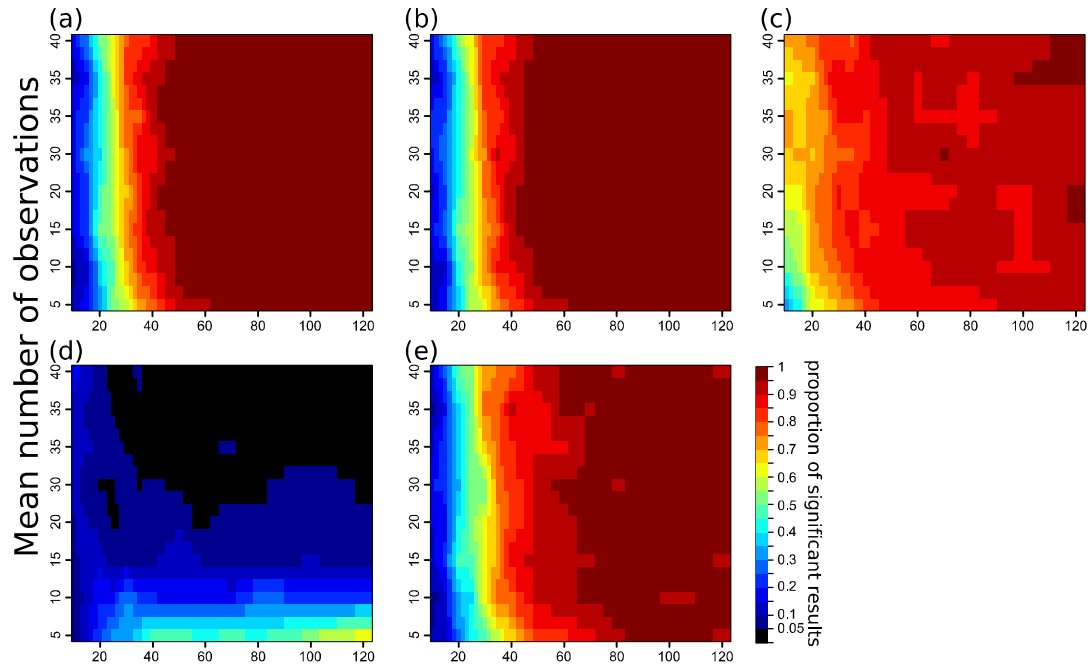

1011  
1012  
1013  
1014  
1015  
1016  
1017  
1018  
1019  
1020  
1021  
1022  
1023

**Figure S5. Proportions of statistically significant results for differently-sized networks and different observation efforts for simulation 3 under the scenario where kinship predicts association rates (edge weights).** Panels represent the P values calculated using (a) node permutation tests with the coefficient value as the test statistic, (b) node permutation tests controlling for number of observations, (c) pre-network permutation tests with the coefficient value as the test statistic, (d) pre-network permutation tests with the t statistic as the test statistic, and (e) double permutation tests with the coefficient as the test statistic. These results highlight the propensity for pre-network permutation tests (c) to be more likely to produce significant results when networks have few nodes but many observations (left-hand of the plot relative to panels a, b and e). Further, results show that using the t statistic (d) produces unreliable results (i.e. the significance does not increase with when more observations are made).

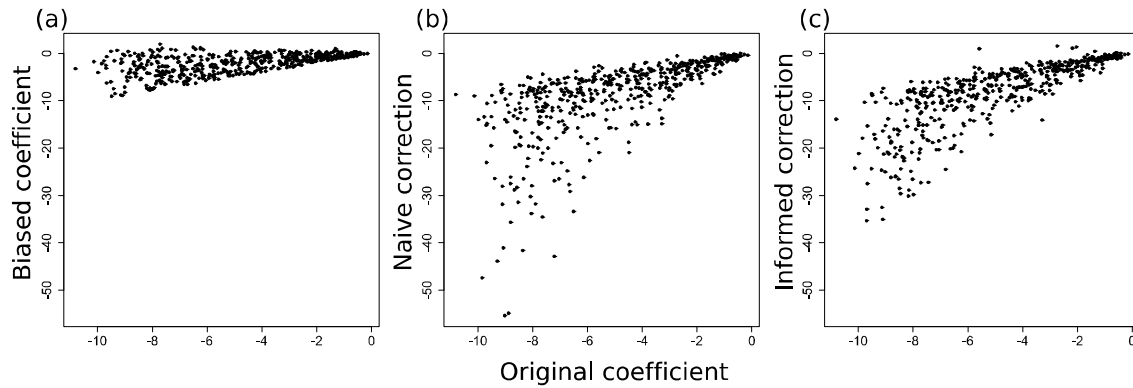

1024  
1025  
1026  
1027  
1028  
1029  
1030  
1031  
1032  
1033  
1034  
1035  
1036  
1037

**Figure S6. Relationship between the original coefficient value (the relationship between degree and sex prior to introducing an observation bias) and estimations of the coefficient value using the data from simulation 2 where an effect is present (females are more gregarious).** (a) The original coefficient versus the coefficient estimated from the biased observations. (b) The original coefficient versus a naïve correction involving adding only the number of observation for each individual as a covariate in the model. (c) The original coefficient versus an informed correction that involves including an interaction term between sex and the number of observations. Each point represents one simulation. While these coefficients are correlated, the corrected coefficient values can be greatly over-estimated, suggesting that adding the number of observations into a model does not produce reliable effect sizes.

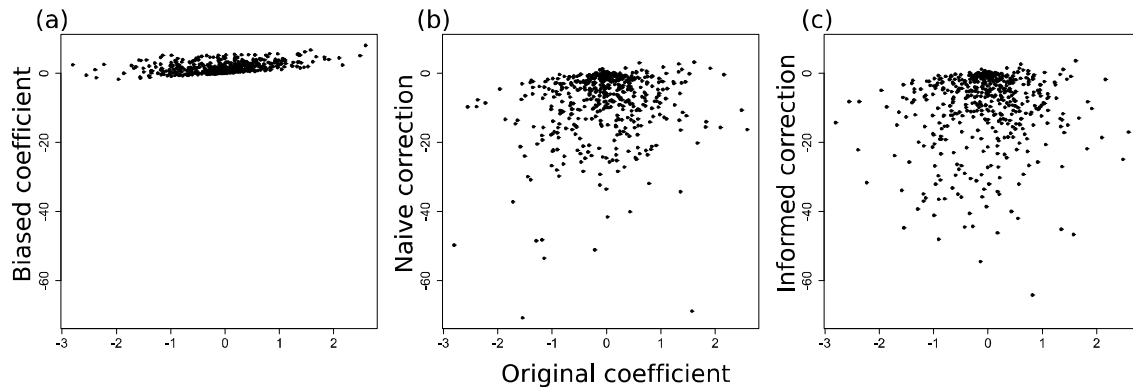

1038  
1039  
1040  
1041  
1042  
1043  
1044  
1045  
1046  
1047  
1048  
1049

**Figure S7. Relationship between the original coefficient value (the relationship between degree and sex prior to introducing an observation bias) and estimations of the coefficient value using the data from simulation 2 where no effect is present (females and males are equally gregarious).** (a) The original coefficient versus the coefficient estimated from the biased observations. (b) The original coefficient versus a naïve correction involving adding only the number of observation for each individual as a covariate in the model. (c) The original coefficient versus an informed correction that involves including an interaction term between sex and the number of observations. Each point represents one simulation. Because there was no original effect present, the coefficients are not correlated. However, the corrected coefficient values generate extremely large coefficient values, suggesting that adding the number of observations into a model does not produce reliable effect sizes.
